# Supplementary material for: Apple Derived Exosomes Improve Collagen Type I Production and Decrease MMPs during Aging of the Skin through Downregulation of the NF-κB Pathway as Mode of Action
Source: MDPI journal article supplement (doi:10.3390/cells11243950), 2022-12-07
Supplement: s1 [file s1]

**Table S1.** Other less significant [-log(p-value) < 6] canonical pathways for w/ TNF $\alpha$  dataset.

| Canonical Ptw               | $-\log_{10}$<br>(p-value) | z-<br>Score | Molecules                                                                                                                                                                                   |
|-----------------------------|---------------------------|-------------|---------------------------------------------------------------------------------------------------------------------------------------------------------------------------------------------|
| Inflammasome                | 2.42                      | -2          | IL1B,MYD88,NFKB2,PANX1                                                                                                                                                                      |
| NF- $\kappa$ B<br>Signaling | 1.59                      | -2.11       | BMP2,BMPR1B,CARD10,FCER1G,IL1A,IL1B,IL1RN,IL33,KDR<br>,MAP2K6,MYD88,NFKB2,NFKBIA,NFBIE,PIK3C2B,PIK3R6,R<br>ALA,RAP2A,RASD1,RELA,RELB,TGFA,TGFBR3,TNFAIP3,T<br>NFRSF11A,TNFRSF1B,TNIP1,TRADD |
| IL-3 Signaling              | 2.92                      | -2.12       | INPP5D,MAP2K1,PIK3C2B,PIK3R6,PPP3CC,PRKCD,RALA,R<br>AP2A,RASD1                                                                                                                              |
| IL-1 Signaling              | 3.47                      | -2.33       | ADCY4,IKBKE,IL1A,IRAK2,MAP2K6,MYD88,NFKB2,NFKBI<br>A,NFKBIE,RELA,RELB                                                                                                                       |
| iNOS<br>Signaling           | 4.69                      | -2.82       | IKBKE,IRAK2,JAK3,MYD88,NFKB2,NFKBIA,NFKBIE,RELA,R<br>ELB                                                                                                                                    |
| IL-8 Signaling              | 5.13                      | -2.82       | DIRAS3,HBEGF,IKBKE,IRAK2,KDR,LIMK2,MAP2K1,MMP9,<br>NFKBIA,NFKBIE,PIK3C2B,PIK3R6,PRKCD,PTGS2,RALA,RA<br>P2A,RASD1,RELA,TEK,VEGFA,VEGFC                                                       |
